# Psychiatric Services

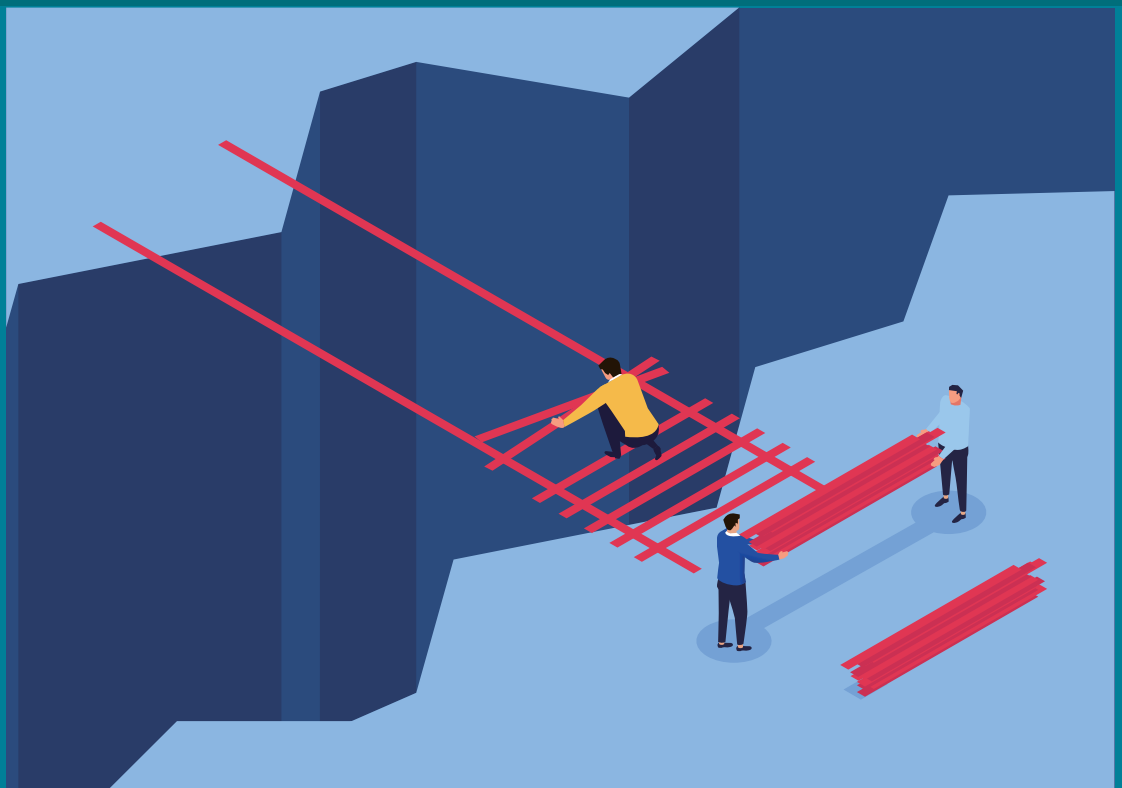

Introducing the Policy Review: building bridges between evidence and policy  
in mental health services research

Feasibility of peer-delivered suicide safety planning in the emergency department

Measurement-based care for depression in community mental health

The utility of “medical clearance” of psychiatric patients: meta-analysis and commentary
